# Supplementary material for: Biodegradable nanoparticles bearing amine groups as a strategy to alter surface features, biological identity and accumulation in a lung metastasis model
Source: Royal Society of Chemistry journal article supplement (doi:10.1039/c8tb01330f), 2018-01-01
Supplement: c8tb01330f1.pdf [file c8tb01330f1.pdf]

## Electronic Supporting Information

### Biodegradable nanoparticles based on an amine terminated polyester as a strategy to tune surface properties, protein interaction and accumulation in lung metastasis

Diletta Esposito,<sup>a†</sup> Claudia Conte,<sup>a†</sup> Giovanni Dal Poggetto,<sup>b†</sup> Annapina Russo,<sup>c</sup> Antonio Barbieri,<sup>d</sup> Francesca Ungaro,<sup>a</sup> Claudio Arra,<sup>d</sup> Giulia Russo,<sup>c</sup> Paola Laurienzo,<sup>b</sup> Fabiana Quaglia<sup>\*a</sup>

---

*a.* Drug Delivery Laboratory, Department of Pharmacy, University of Naples Federico II, Naples, Italy.

*b.* Institute for Polymers, Composites and Biomaterials, CNR, Pozzuoli (Naples), Italy.

*c.* Laboratory of Biochemistry, Department of Pharmacy, University of Naples Federico II, Naples, Italy.

*d.* Animal Facility, National Cancer Institute - Foundation "G. Pascale", Naples, Italy

---

<sup>†</sup> These authors contributed equally; <sup>\*</sup>corresponding author.

## Table of Contents

|                                                                                                   |   |
|---------------------------------------------------------------------------------------------------|---|
| Scheme S1. Synthetic strategy for PCL-NH <sub>2</sub> .....                                       | 1 |
| Figure S1. FTIR spectra of PCL-N <sub>3</sub> (a) and PCL-NH <sub>2</sub> (b) .....               | 1 |
| Figure S2. <sup>1</sup> H NMR spectrum of PCL-NH <sub>2</sub> (solvent: CDCl <sub>3</sub> ) ..... | 2 |
| Figure S3. Distribution curves of nanoparticles in water and PBS pH 7.4.....                      | 2 |
| Figure S4. Distribution curves of nanoparticles in human plasma.....                              | 3 |
| Figure S5. Nanoparticles stability in DMEM+FBS and uptake in A549 cells. ....                     | 3 |
| Table S1. Properties of Did-Oil loaded nanoparticles .....                                        | 4 |

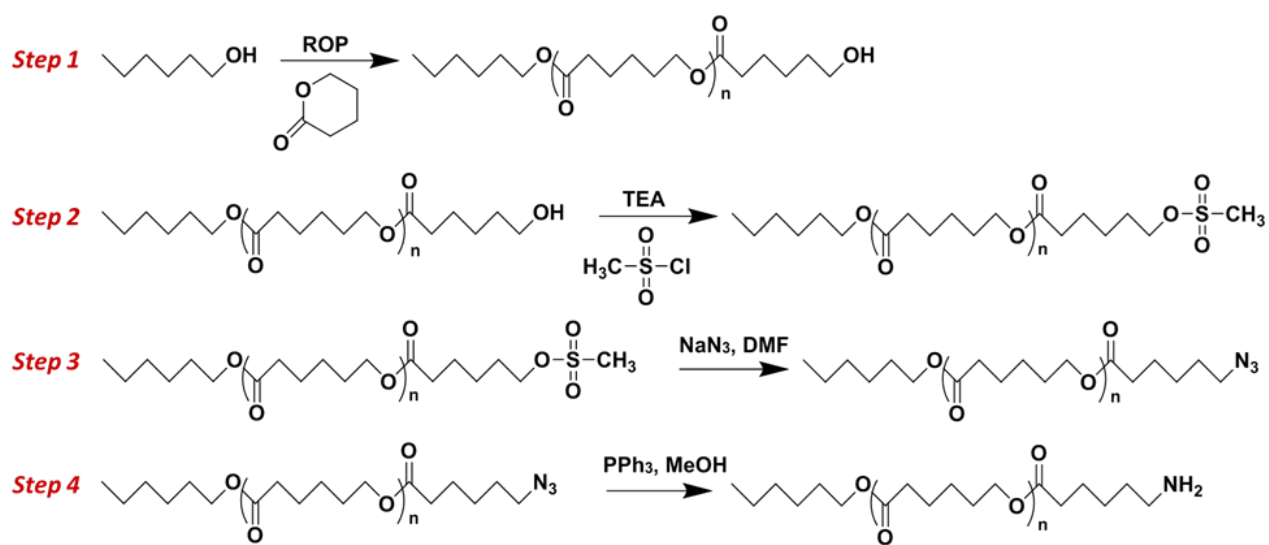

**Scheme S1.** Synthetic strategy for PCL-NH<sub>2</sub>.

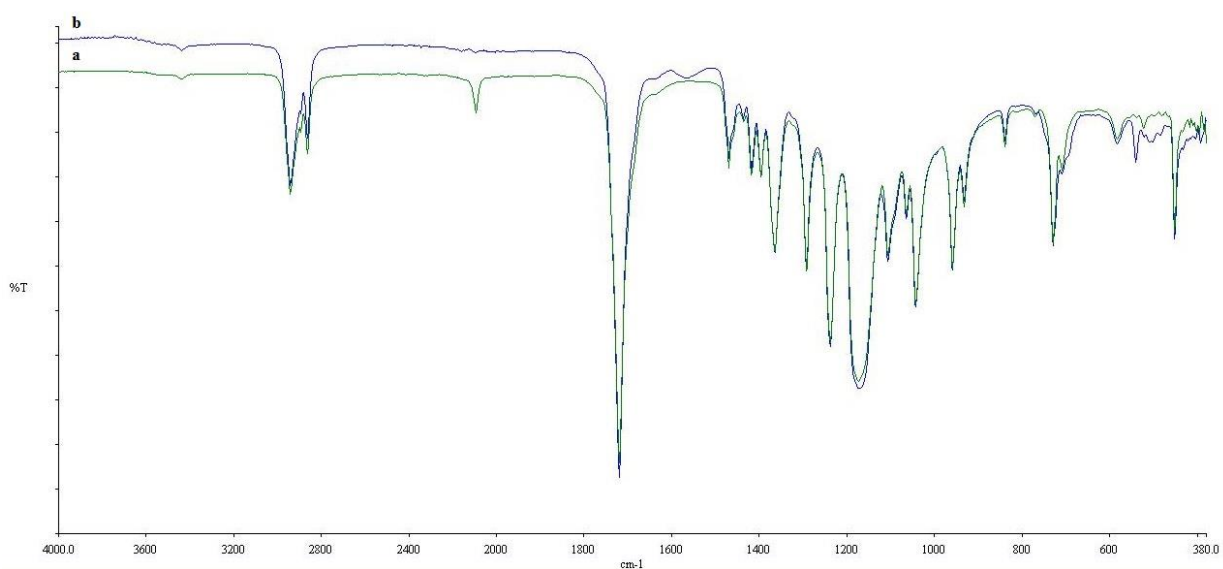

**Figure S1.** FTIR spectra of PCL-N<sub>3</sub> (a) and PCL-NH<sub>2</sub> (b)

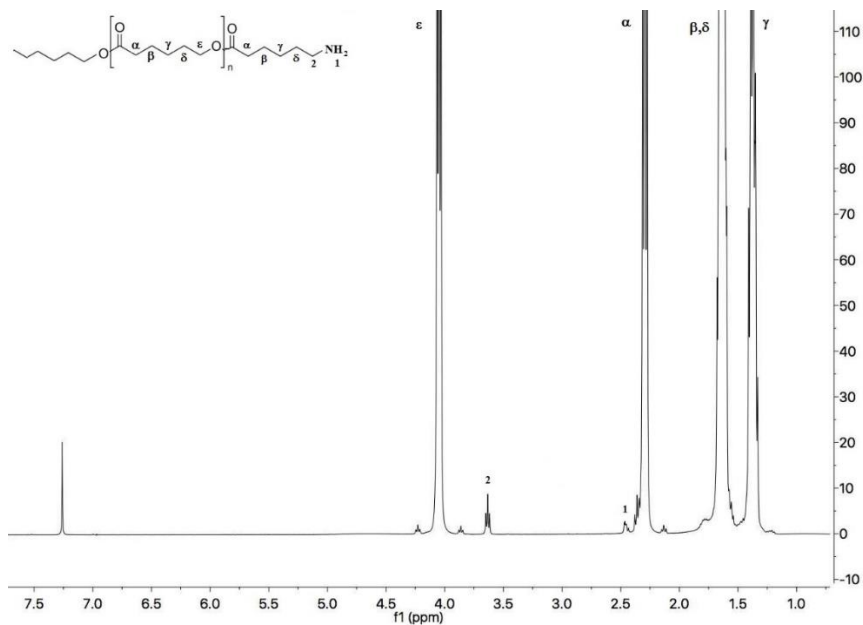

**Figure S2.**  $^1\text{H}$  NMR spectrum of PCL-NH<sub>2</sub> (solvent: CDCl<sub>3</sub>)

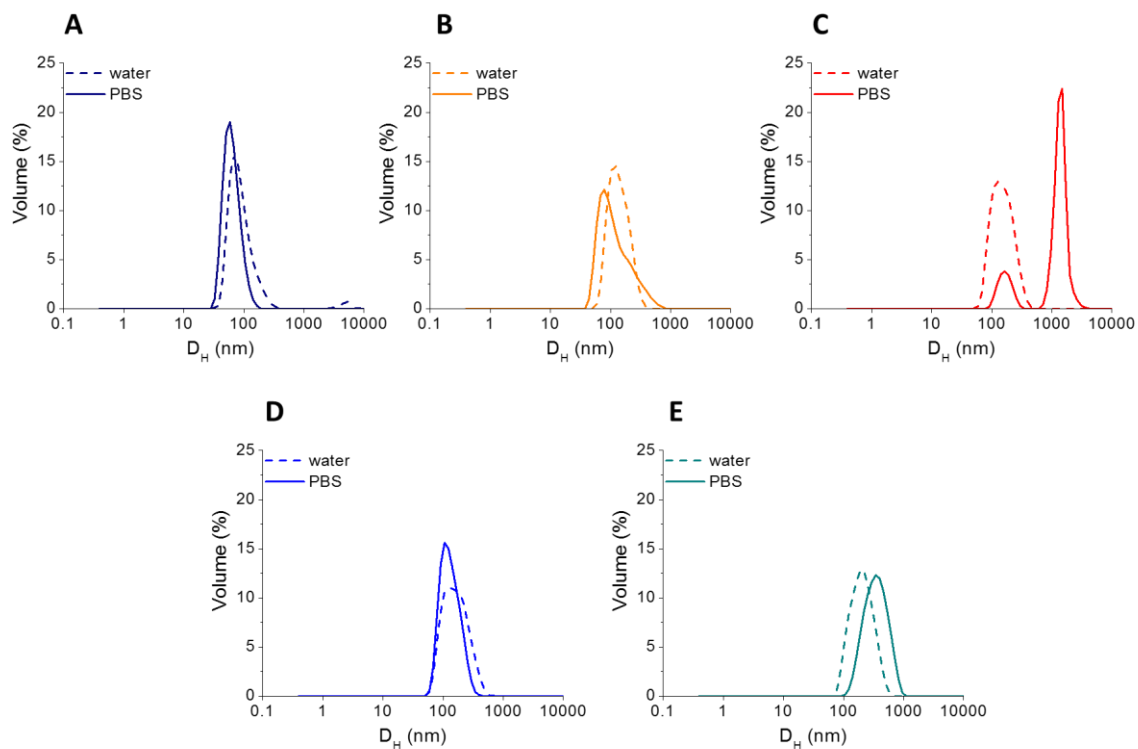

**Figure S3.** Distribution curves of PEG-NPs (A), NH<sub>2</sub>/PEG-NPs (B), NH<sub>2</sub>-NPs (C), NH<sub>2</sub>/PEG-NPs@HA (D) and NH<sub>2</sub>-NPs@HA (E) in water and in PBS pH 7.4 after 30 minutes of incubation at 37 °C.

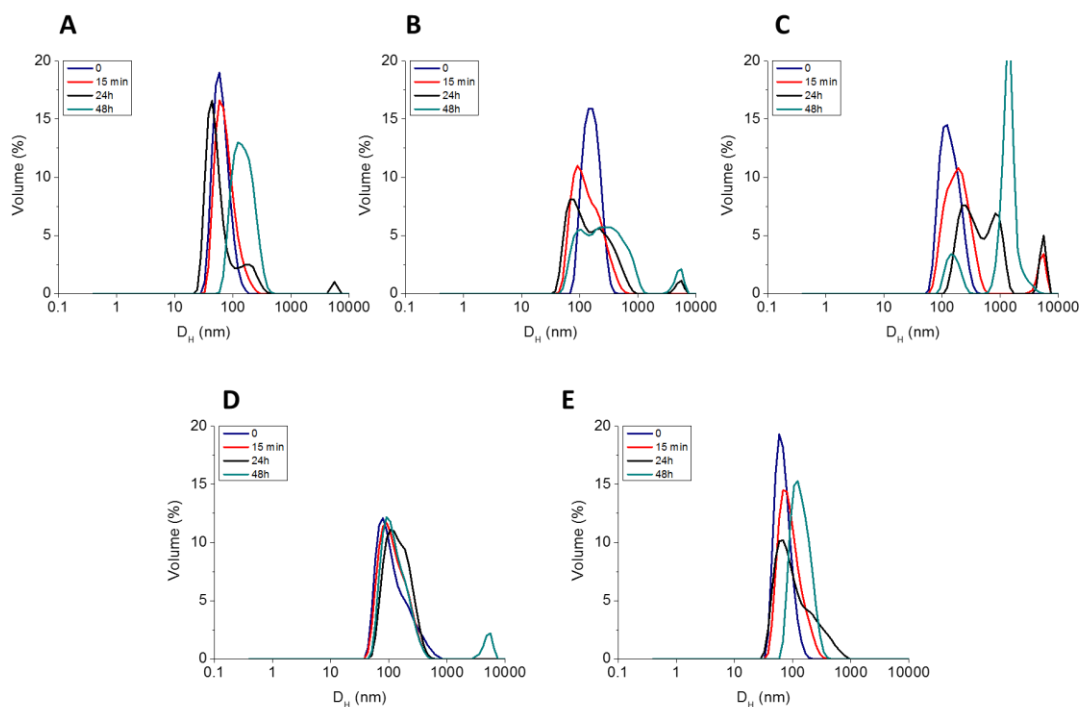

**Figure S4.** Distribution curves of PEG-NPs (A), NH<sub>2</sub>/PEG-NPs (B), NH<sub>2</sub>-NPs (C), NH<sub>2</sub>/PEG-NPs@HA (D) and NH<sub>2</sub>-NPs@HA (E) in human plasma along time.

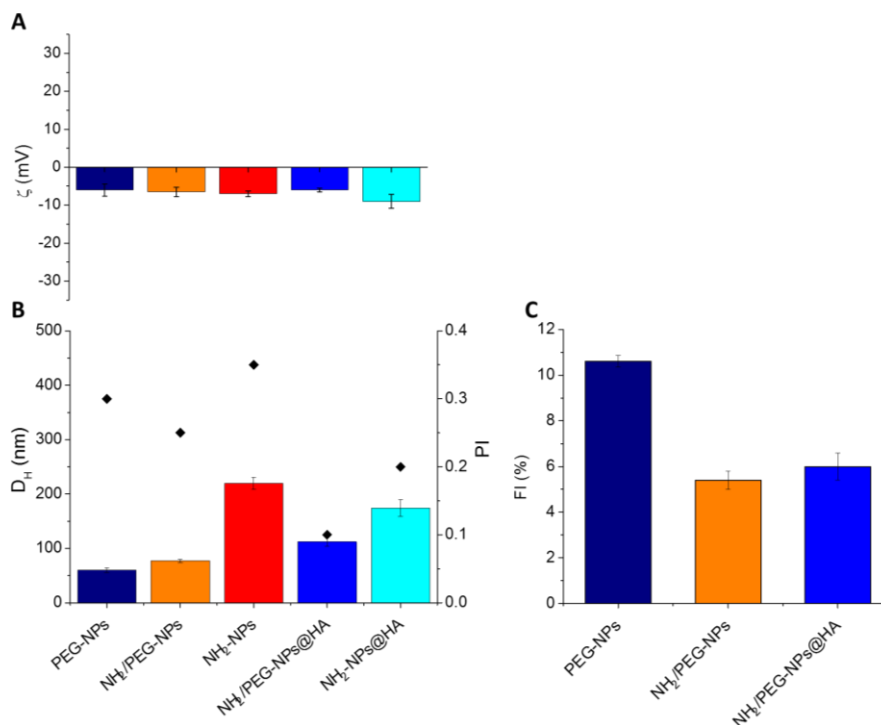

**Figure S5.** NPs properties in DMEM+FBS. A) Zeta potential ( $\zeta$ ); B) mean diameter ( $D_H$ ); C) uptake of DiD-Oil loaded NPs in A549 cells after 4 h ([NPs]= 0.5 mg/mL). Results are the mean of three measurements obtained on three different NP batches.

Table S1. Properties of Did-Oil loaded nanoparticles

| <b>Formulation code</b>                       | <b>Size<br/>(nm ± SD)</b> | <b>PI</b> | <b>ζ<br/>(mV ± SD)</b> | <b>Actual load<br/>mg Did-Oil/100<br/>mg NPs</b> | <b>Encaps. Eff<br/>(%)</b> |
|-----------------------------------------------|---------------------------|-----------|------------------------|--------------------------------------------------|----------------------------|
| Did-Oil/PEG-NPs                               | 119±8                     | 0.2       | -8±4                   | 0.19                                             | 95                         |
| Did-Oil/NH <sub>2</sub> /PEG-NPs <sup>a</sup> | 121±12                    | 0.2       | +8±3                   | 0.19                                             | 95                         |
| Did-Oil/NH <sub>2</sub> /PEG-NPs@HA           | 124±11                    | 0.1       | -12±4                  | 0.20                                             | 98                         |

<sup>a</sup>NH<sub>2</sub>-PCL/mPEG-PCL ratio was 1:1 by weight
